# Supplementary material for: The Impact of Bioinformatics Pipelines on Microbiota Studies: Does the Analytical “Microscope” Affect the Biological Interpretation?
Source: MDPI journal article supplement (doi:10.3390/microorganisms7100393), 2019-09-26
Supplement: s1 [file s1]

## The impact of bioinformatics pipelines on microbiota studies: does the analytical “microscope” affect the biological interpretation?

Léa Siegwald<sup>1</sup>, Ségolène Caboche<sup>1,2</sup>, Gaël Even<sup>1,3</sup>, Eric Viscogliosi<sup>2</sup>, Christophe Audebert<sup>1,3,#</sup> and Magali Chabé<sup>2,#,\*</sup>

### Suppl. File: Figure S1, Figure S2 & Figure S3

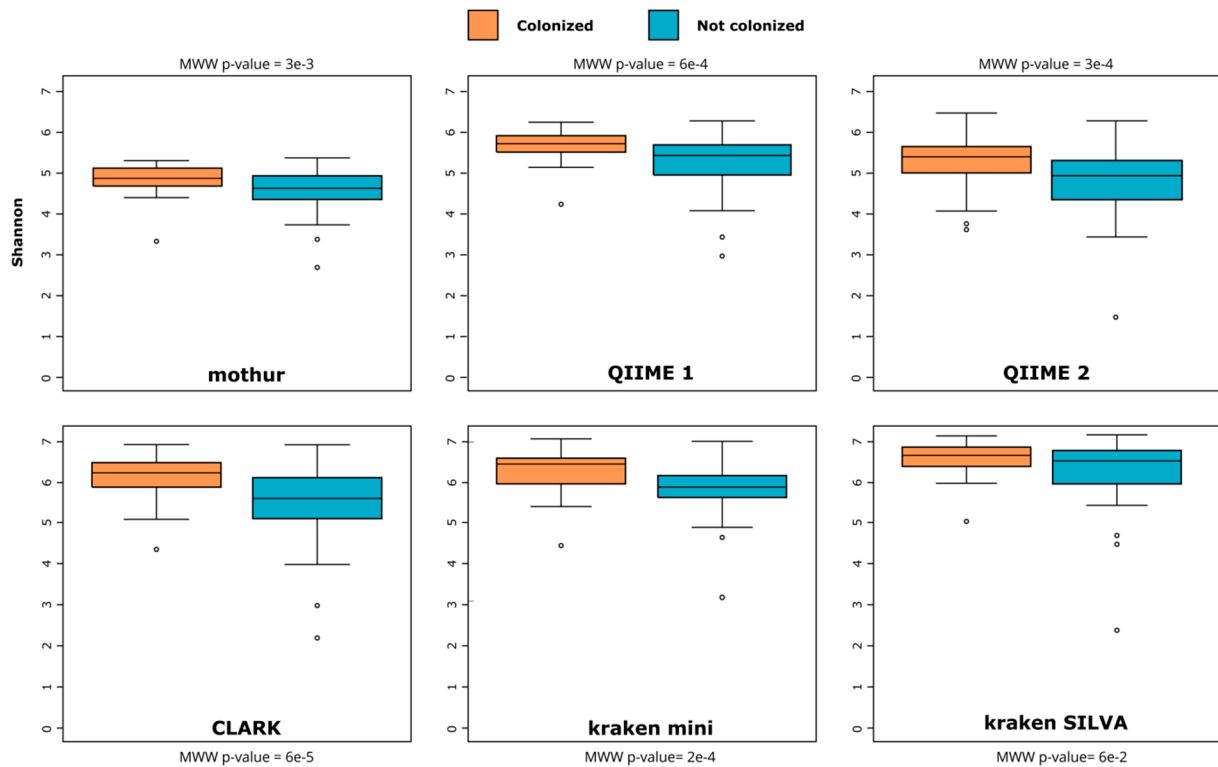

**Figure S1.** Shannon indices boxplots at the family level between both groups of patients (*Blastocystis*-colonized and *Blastocystis*-free), for all pipelines. Difference between groups has been tested using a Mann-Whitney-Wilcoxon (MWW) test [18,24].

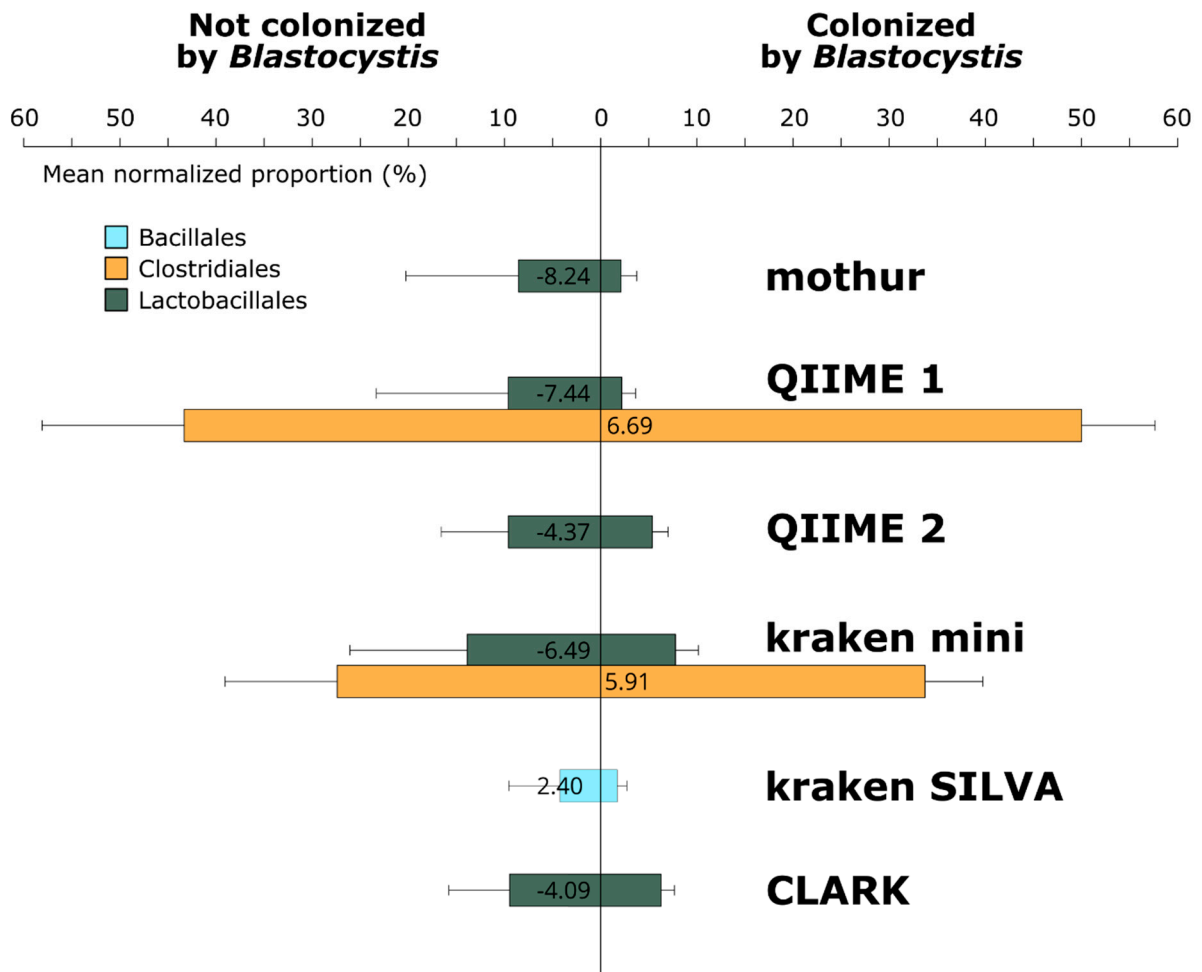

**Figure S2.** Mean proportions of each order significantly different between both groups (the difference between groups has been tested reproducing the original study secondary analysis: using a non-parametric Student test with a Benjamini-Hochberg correction; only the orders with a q-value < 0.05 and an effect size above 1 % have been represented). Values on each bar is the difference of means between both groups.

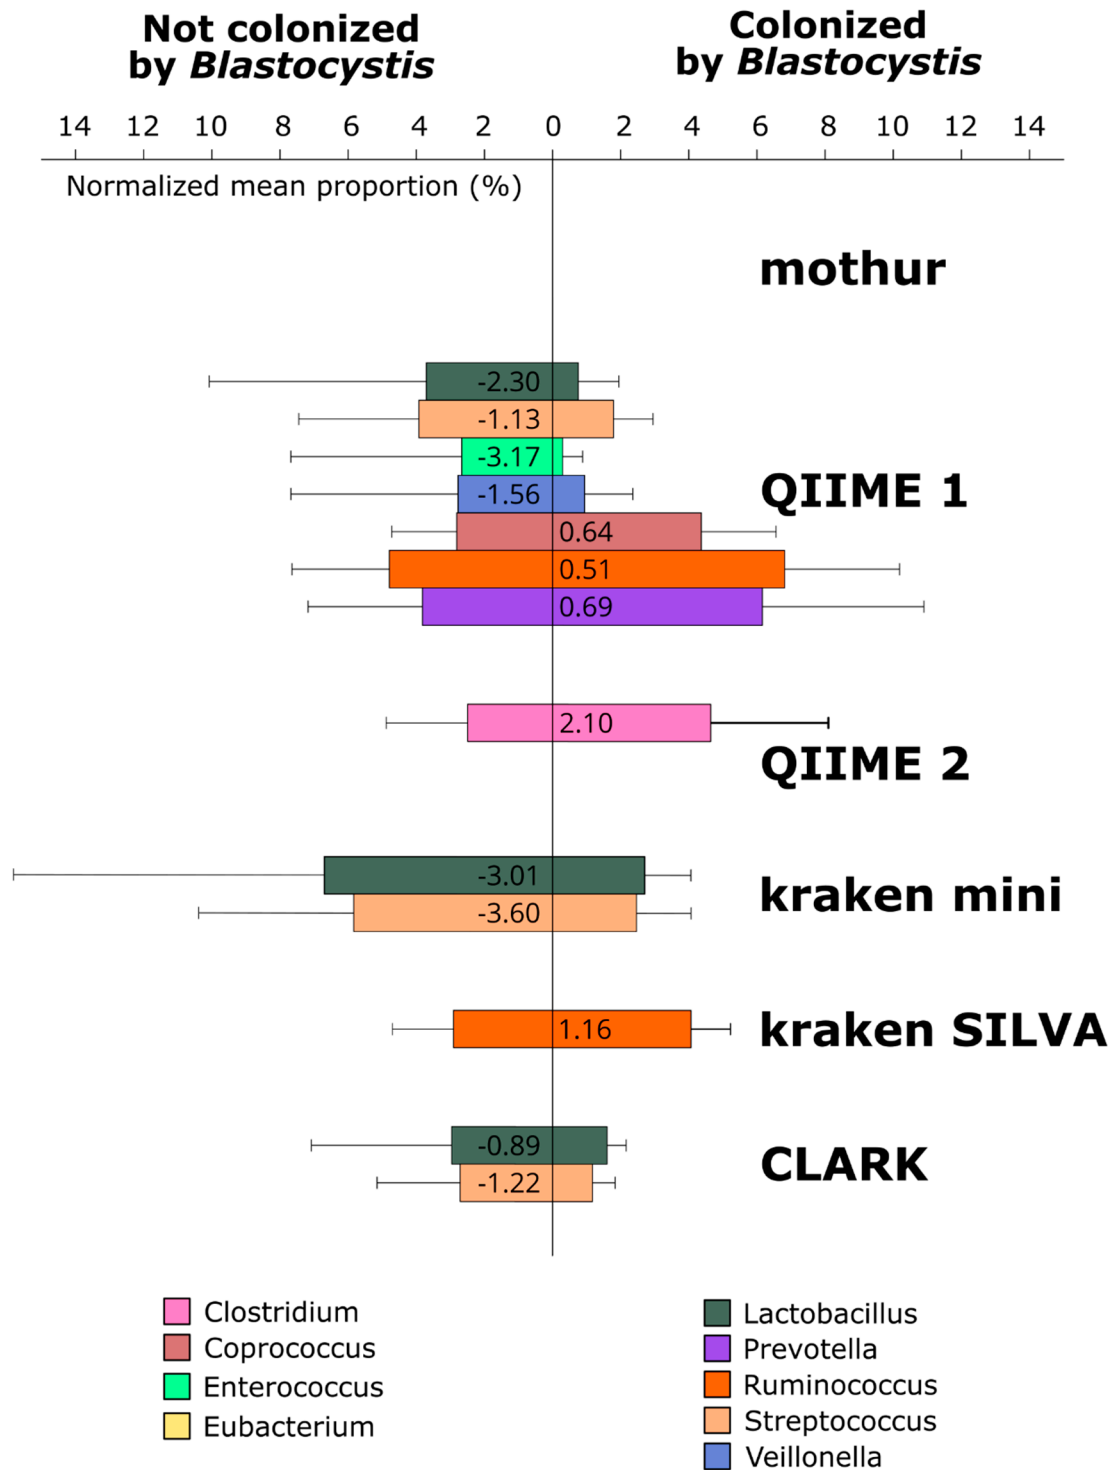

**Figure S3.** Mean proportions of each genus significantly different between both groups (the difference between groups has been tested reproducing the original study secondary analysis: using a non-parametric Student test with a Benjamini-Hochberg correction; only the genera with a q-value < 0.05 and an effect size above 1 % have been represented). Values on each bar is the difference of means between both groups.
